# Supplementary material
Source: PubMed Central journal article supplement (PMC3634529)
Supplement: tjp0591-2205-SD1.pdf [file tjp0591-2205-SD1.pdf]

**Supplemental Table 1. Physiological parameters:**

|                                 | <i>WT animals</i><br>( <i>n</i> =7) | <i>AQP2-CNT-KO</i><br><i>animals (n=7)</i> |
|---------------------------------|-------------------------------------|--------------------------------------------|
| Weight (g)                      | 24.2 ±0.9                           | 24.7 ±0.9                                  |
| Drinking (mL/20 g BW)           | 4.1 ±0.2                            | 5.4 ±0.6                                   |
| Food intake (g/20 g BW)         | 2.5 ±0.3                            | 2.7 ±0.2                                   |
| Urine volume (ml/20 g BW)       | 0.7 ±0.1                            | 1.5 ±0.2*                                  |
| Urine osmolality (mOsm/kg)      | 2881 ±288                           | 1767 ±177*                                 |
| Osmolar excretion (μOsm/24 hrs) | 2416 ±227                           | 3052 ±213                                  |

Values are the average measurements from two days. Values are mean ±s.e. \**P*<0.05

**Supplemental Table 2. Physiological parameters following lithium chloride treatment:**

|                                    | <i>WT animals (n=8)</i>                |                                    | <i>AQP2-CNT-KO animals</i><br>( <i>n</i> =8) |                                    |
|------------------------------------|----------------------------------------|------------------------------------|----------------------------------------------|------------------------------------|
|                                    | <i>Normal diet</i><br>( <i>day 0</i> ) | <i>Li diet</i><br>( <i>day 8</i> ) | <i>Normal diet</i><br>( <i>day 0</i> )       | <i>Li diet</i><br>( <i>day 8</i> ) |
| Plasma Sodium (mM)                 |                                        | 143.3 ±3.1                         |                                              | 144.9 ±2.3                         |
| Plasma Lithium (mM)                |                                        | 0.27 ±0.02                         |                                              | 0.34 ±0.06                         |
| Body weight (g)                    | 23.8 ±1.0                              | 22.7 ±0.7                          | 23.5 ±0.9                                    | 22.6 ±0.8                          |
| Osmolar excretion<br>(μOsm/24 hrs) | 3380 ±235                              | 3759 ±102                          | 3568 ±292                                    | 3743 ±142                          |
| Food intake (g/20 g BW)            | 3.1 ±0.2                               | 3.0 ±0.2                           | 3.2 ±0.2                                     | 3.2 ±0.2                           |

Values are mean ±s.e. \**P*<0.05

## Supplemental figure legends

**Supplemental figure 1:** Effects of lithium chloride treatment on urinary concentration in AQP2-CNT-KO mice. 24 hr drinking volume (A), urine volume (B) and urine osmolality (C) of control (WT) and AQP2-CNT-KO mice (KO) during 8 days lithium chloride diet. n=8 per group. Values are mean  $\pm$ s.e. \* $P$ <0.05 .

**Supplemental figure 2:** Immunoblots of cortical and inner medullary kidney homogenates of mice treated with lithium chloride for 8 days. A) The expression of AQP2, AQP3, NCX1, Pendrin and actin was determined in cortical kidney homogenates from either wildtype (WT) or AQP2-CNT-KO mice (KO). B) The expression of AQP2, AQP3 and actin was determined in inner medullary kidney homogenates from the same animals. Data are band densities relative to WT (mean  $\pm$ s.e.) after normalization to actin expression. n=8 per group. \* $P$  <0.05.

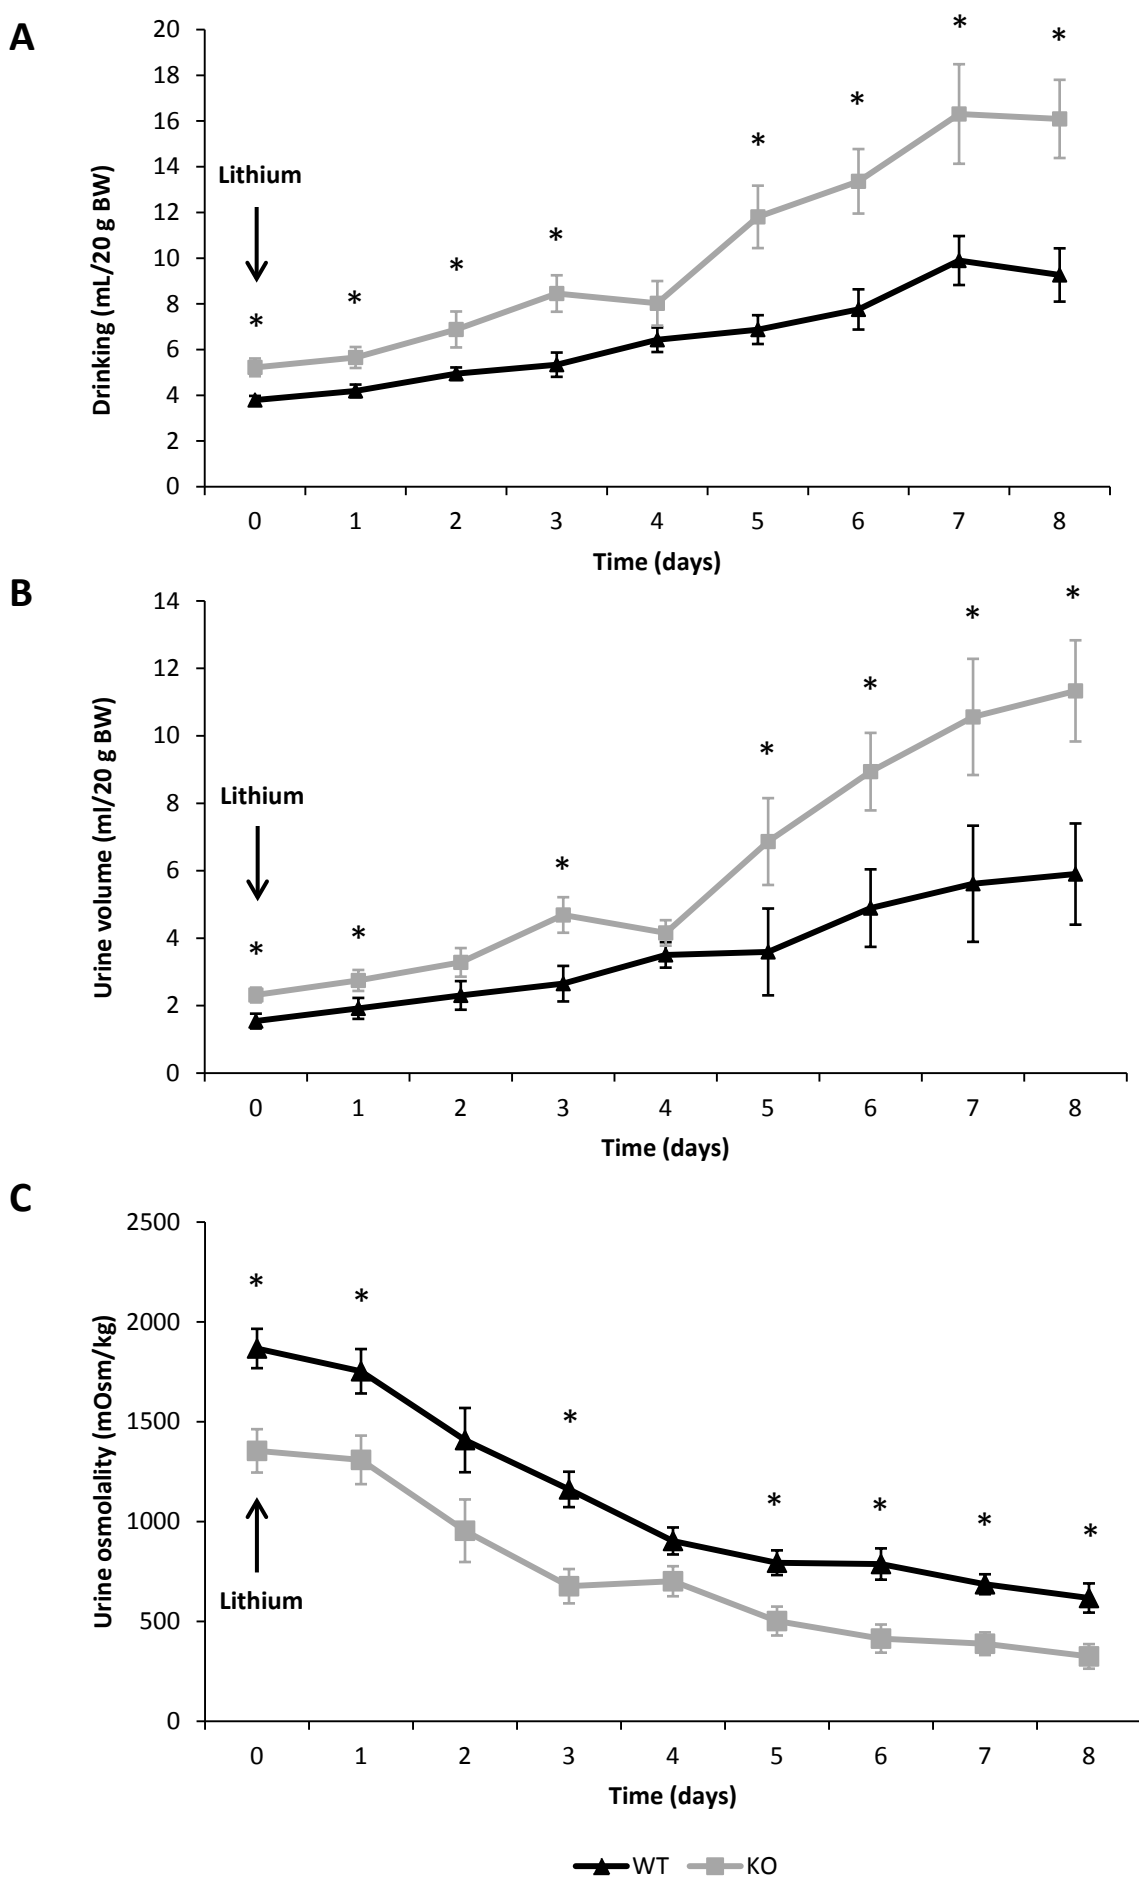

**Supplemental figure 1:** Effects of lithium chloride treatment on urinary concentration in AQP2-CNT-KO mice. 24 hr drinking volume (A), urine volume (B) and urine osmolality (C) of control (WT) and AQP2-CNT-KO mice (KO) during 8 days lithium chloride diet. n=8 per group. Values are mean  $\pm$  s.e. \* $P$ <0.05.

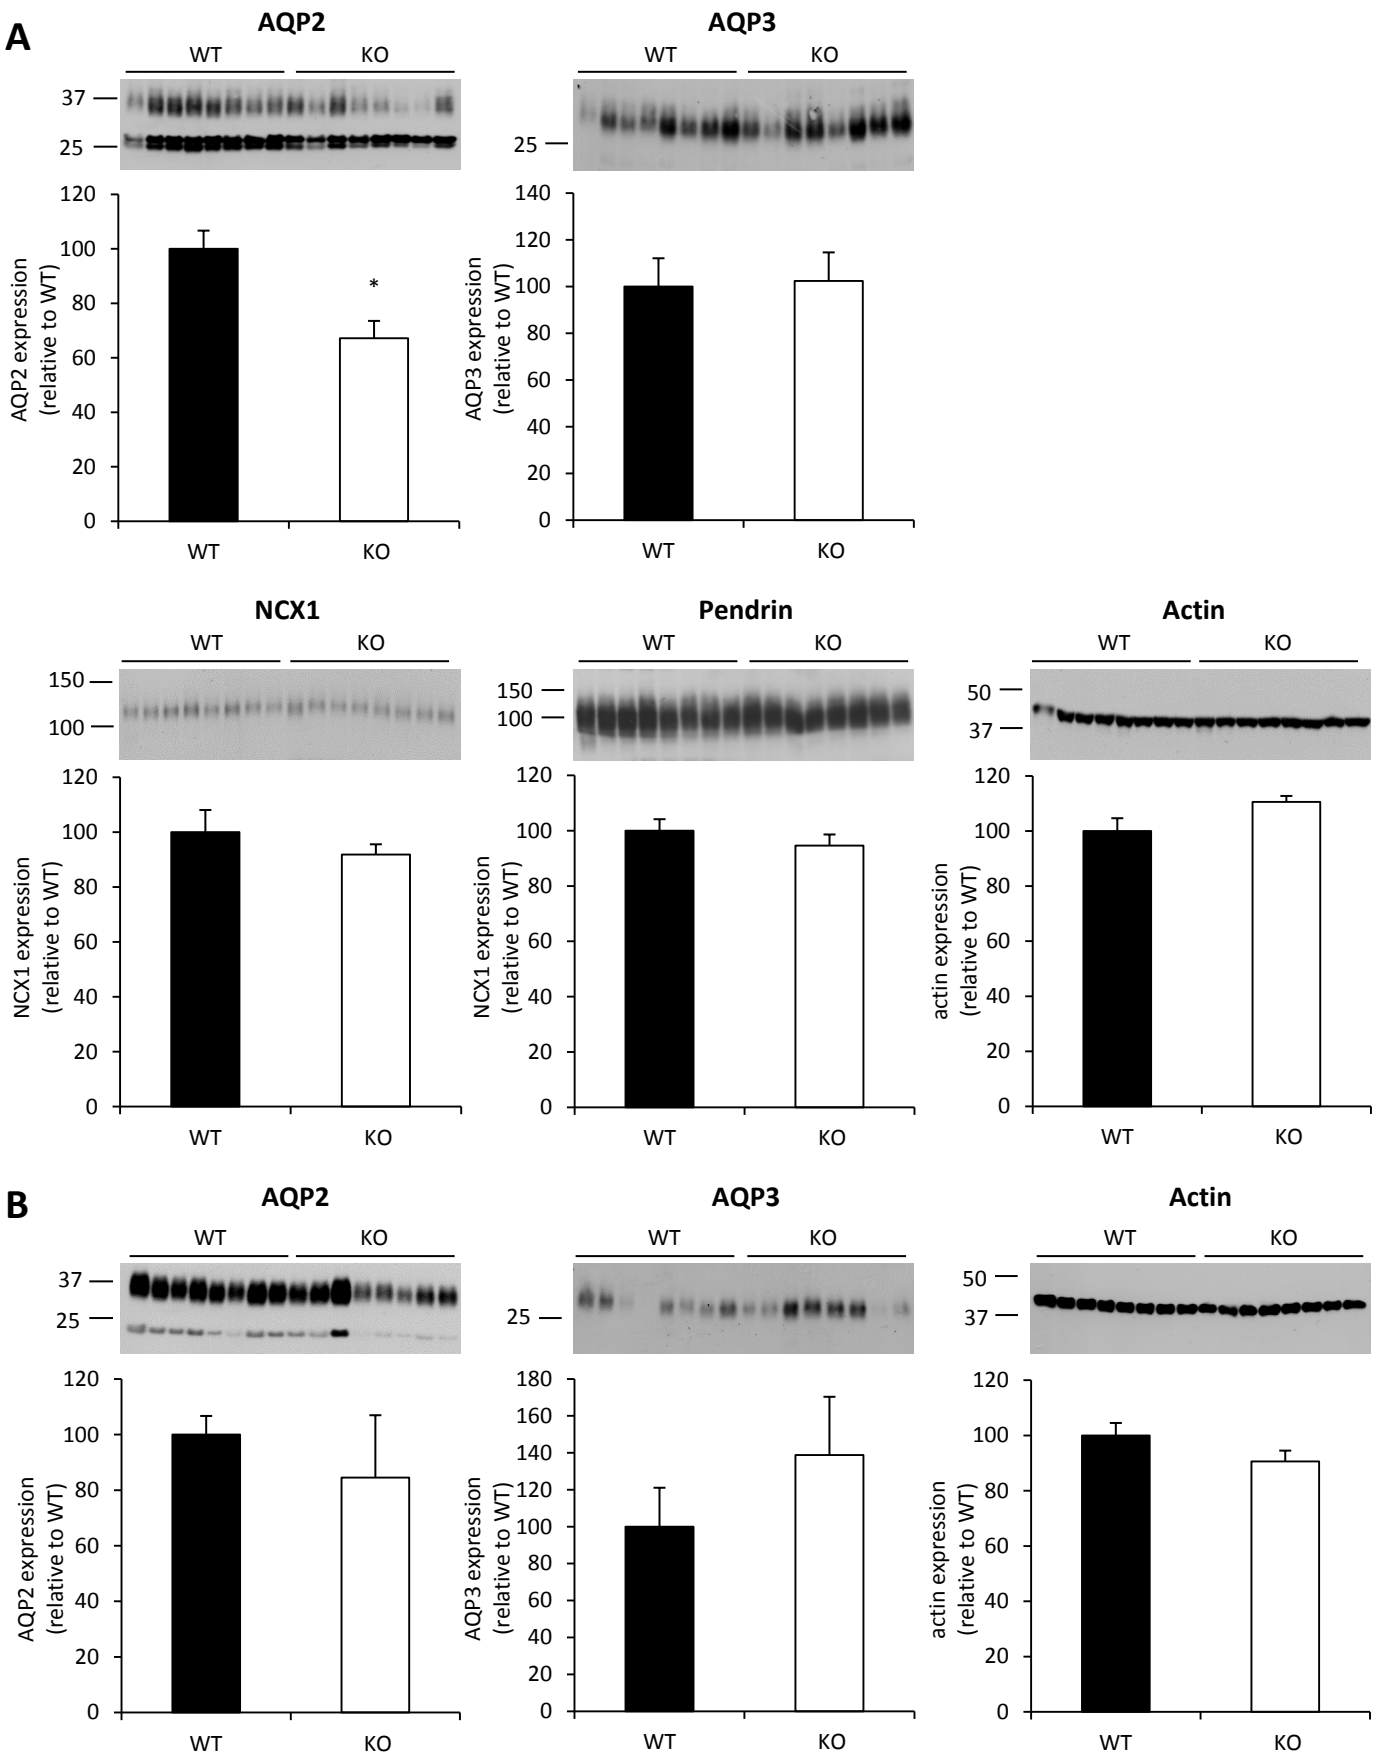

**Supplemental figure 2:** Immunoblots of cortical and inner medullary kidney homogenates of mice treated with lithium chloride for 8 days. A) The expression of AQP2, AQP3, NCX1, Pendrin and actin was determined in cortical kidney homogenates from either wildtype (WT) or AQP2-CNT-KO mice (KO). B) The expression of AQP2, AQP3 and actin was determined in inner medullary kidney homogenates from the same animals. Data are band densities relative to WT (mean  $\pm$ s.e.) after normalization to actin expression. n=8 per group. \* $P < 0.05$ .
